# Supplementary material for: Expressing OsMPK4 Impairs Plant Growth but Enhances the Resistance of Rice to the Striped Stem Borer Chilo suppressalis
Source: Int J Mol Sci. 2018 Apr 13;19(4):1182. doi: 10.3390/ijms19041182 (PMC5979284; doi:10.3390/ijms19041182)
Supplement: Supplementary file 1 [file ijms-19-01182-s001.pdf]

# Supplementary Materials: Expressing *OsMPK4* Impairs Plant Growth but Enhances the Resistance of Rice to the Striped Stem Borer *Chilo suppressalis*

Xiaoli Liu, Jiancai Li, Liping Xu, Qi Wang and Yonggen Lou\*

```
1 ATGGATTCTCTCCTCCGGCGGCGCGGGCGGCGGCGGCGCGCAGATCAAGGGGATGGGG
1 M D S S S G G A G G G G G A Q I K G M G
61 ACGCACGGGGGCGCGTACGTGCTGTACACGTGTACGGGAACCTTCTTCGAGGTCTCCTCC
21 T H G G R Y V L Y N V Y G N F F E V S S
121 AAGTACGCCCCCTCCCATCCGCCCATCGGCCGGGGCGCCTACGGCATTGTCTGCGCGGCT
41 K Y A P P I R P I G R G A Y G I V C A A
181 GTTAACTCGGAGAACGGCGAGGAAGTTGCCATCAAGAAGATTGGCAATGCATTGCAAC
61 V N S E N G E E V A I K K I G N A F D N
241 CATATCGATGCCAAGCGGACACTGAGAGAAATCAAGCTGCTTCGCCACATGGACCACGAG
81 H I D A K R T L R E I K L L R H M D H E
301 AATATTATTGCCATAAAGGACATAATTCCGCCCCCAAGAAGAGACAACCTTAAATGATGTT
101 N I I A I K D I I R P P R R D N F N D V
361 TACATTGTTTCTGAGTTGATGGATACTGATCTCCATCAGATCATACGCTCAAATCAACCA
121 Y I V S E L M D T D L H Q I I R S N Q P
421 TTGACTGATGACCACTGCCAGTACTTCCTGTACCAAGTTGCTACGAGGGCTAAAAATATGTG
141 L T D D H C Q Y F L Y Q L L R G L K Y V
481 CACTCGGCAATGTCTTGCAACCGTGATCTGAAGCCAAGCAATTTGTTTCCTTAATGCAAA
161 H S A N V L H R D L K P S N L F L N A N
541 TGTGATCTCAAGATTGCTGATTTTGGGCTTGCAAGAACCACTACGGAGACTGACCTCATG
181 C D L K I A D F G L A R T T T E T D L M
601 ACAGAGTATGTGGTCACTCGTTGGTATCGAGCACCAGAGCTGCTGTTGAAGTGTCTCGCAG
201 T E Y V V T R W Y R A P E L L L N C S Q
661 TATACTGCTGCTATTGATGTCTGGTCAGTTGGATGCATACTTGGTGAAATTGTGACTCGT
221 Y T A A I D V W S V G C I L G E I V T R
721 CAACCCCTGTTTCCTGGAAGGGATTACATTAGCAACTAAAATTGATCACTGAGCTGATA
241 Q P L F P G R D Y I Q Q L K L I T E L I
781 GGGTCGCAGATGACTCAAGCCTAGGGTTTCTTCGGAGTGATAATGCAAGAAGATACATG
261 G S P D D S S L G F L R S D N A R R Y M
841 AAACAGCTACCACAGTACCCAAGGCAGGACTTCGCTTGCGCTTCGCAACATGTCTGCT
281 K Q L P Q Y P R Q D F R L R F R N M S A
901 GGTGCAGTCGATCTGTTAGAGAAAATGCTGGTGTGTTGACCCAAGCAGACGGATAACTGTT
301 G A V D L L E K M L V F D P S R R I T V
961 GATGAGGCTCTTCATCACCATACTTGGCTTCTCTTCATGACATCAATGAAGAACCACCC
321 D E A L H H P Y L A S L H D I N E E P T
1021 TGCCAGCACCTTTTCAGCTTTGATTTTGAGCAACCATCCTTTACTGAAGAACATATAAAA
341 C P A P F S F D F E Q P S F T E E H I K
1081 GAACTCATCTGGAGGGAATCCTTGGCATTTAATCCGGATCCTCCCTACTAA
361 E L I W R E S L A F N P D P P Y *
```

**Figure S1.** Sequences of nucleotides and deduced amino acids of *OsMPK4*. The stop codon is marked by an asterisk.

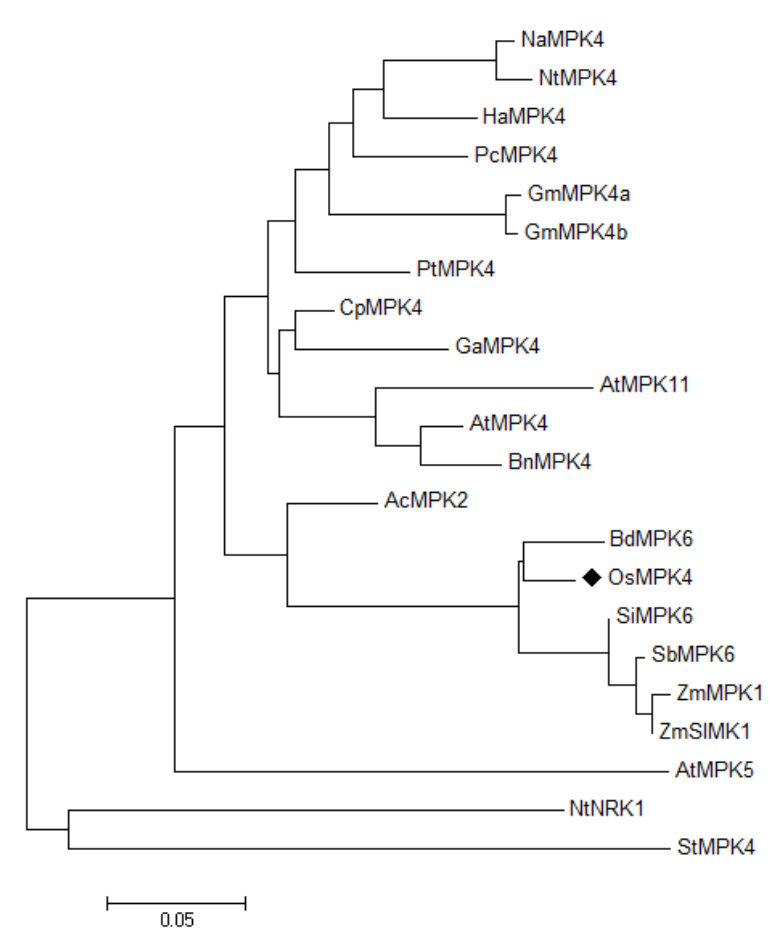

**Figure S2.** Phylogenetic analysis of group B-type MAPKs from different species. The unrooted tree was constructed with a maximum likelihood method on the basis of the alignment of protein sequences and confirmation of the tree topology by bootstrap analysis (1000 replicates) were performed with MEGA software (default settings except the replicates of the bootstrap value). Species acronyms are included before the protein name: Ac, *Ananas comosus*; At, *Arabidopsis thaliana*; Bd, *Brachypodium distachyon*; Bn, *Brassica napus*; Cp, *Carica papaya*; Ga, *Gossypium arboreum*; Gm, *Glycine max*; Ha, *Helianthus annuus*; Na, *Nicotiana attenuata*; Nt, *Nicotiana tabacum*; Os, *Oryza sativa*; Pc, *Petroselinum crispum*; Pt, *Populus trichocarpa*; Sb, *Sorghum bicolor*; Si, *Setaria italica*; St, *Solanum tuberosum*; Zm, *Zea mays*. The scale bar represents 0.05 amino acid substitutions per site in the primary structure. Sequence data in the phylogenetic tree can be found in the GenBank/EMBL data libraries under accession numbers: AcMPK2 (XP\_020080580.1); AtMPK4 (NP\_192046.1); AtMPK5 (NP\_567378.4); AtMPK11 (NP\_001117210.1); BdMPK6 (XP\_003574247.1); BnMPK4 (NP\_001303223.1); CpMPK4 (XP\_021887822.1); GaMPK4 (KHG15311.1); GmMPK4a (NP\_001339892.1); GmMPK4b (NP\_001242364.2); HaMPK4 (XP\_021969289.1); NaMPK4 (ABO65100.1); NtMPK4 (NP\_001312502.1); NtNRK1 (BAB32406.1); OsMPK4 (XP\_015615011.1); PcMPK4 (AAN65180.1); PtMPK4 (XP\_002302599.1); SbMPK6 (XP\_002467591.1); SiMPK6 (XP\_004983829.1); StMPK4 (BAB93529.1); ZmMPK1 (AIX47138.1); ZmMPK4 (BAA74733.1); ZmSIMK1 (NP\_001105239.2). The diamond indicates the gene OsMPK4 that is characterized in this paper.

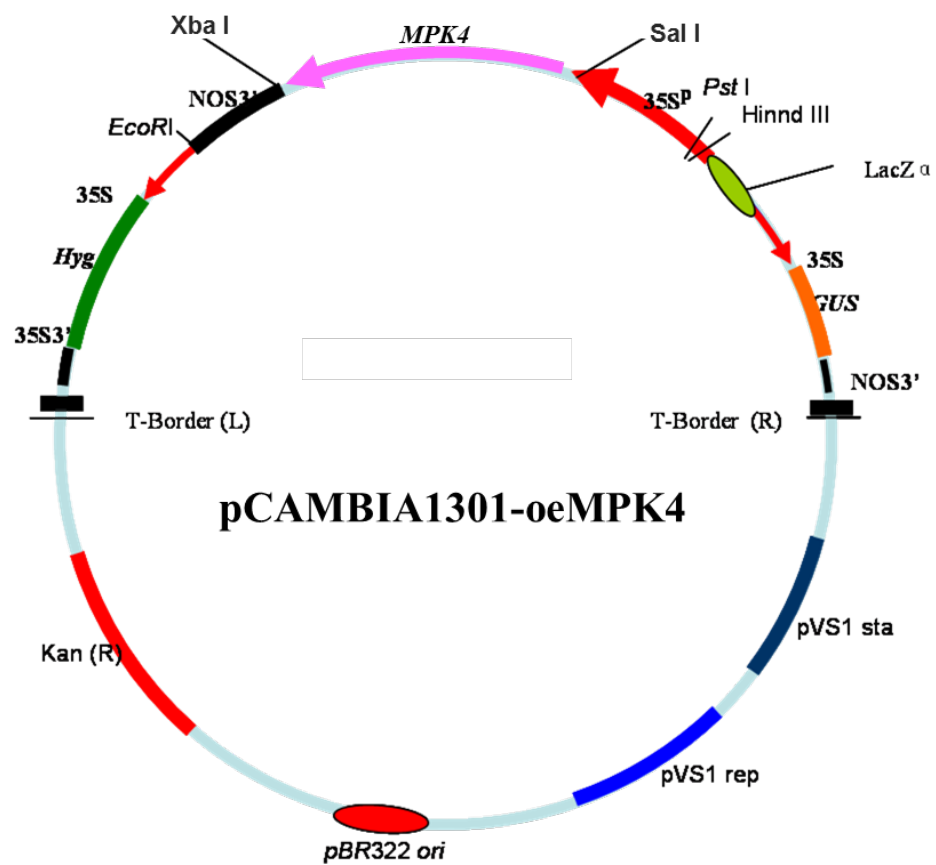

**Figure S3.** Transformation vector used in this study
